# Supplementary material for: Single-nucleus sequencing reveals enriched expression of genetic risk factors in extratelencephalic neurons sensitive to degeneration in ALS
Source: PubMed Central journal article supplement (PMC11257952; doi:10.1038/s43587-024-00640-0), 2024-06-21

# Control pre-/motor cortex

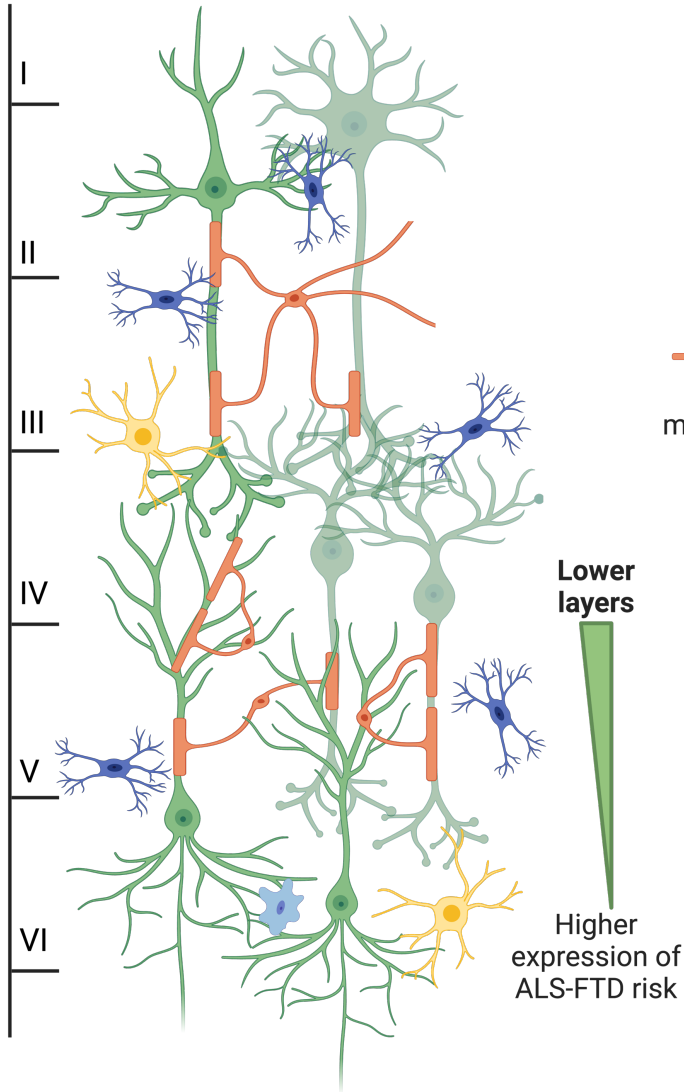

# ALS pre-/motor cortex

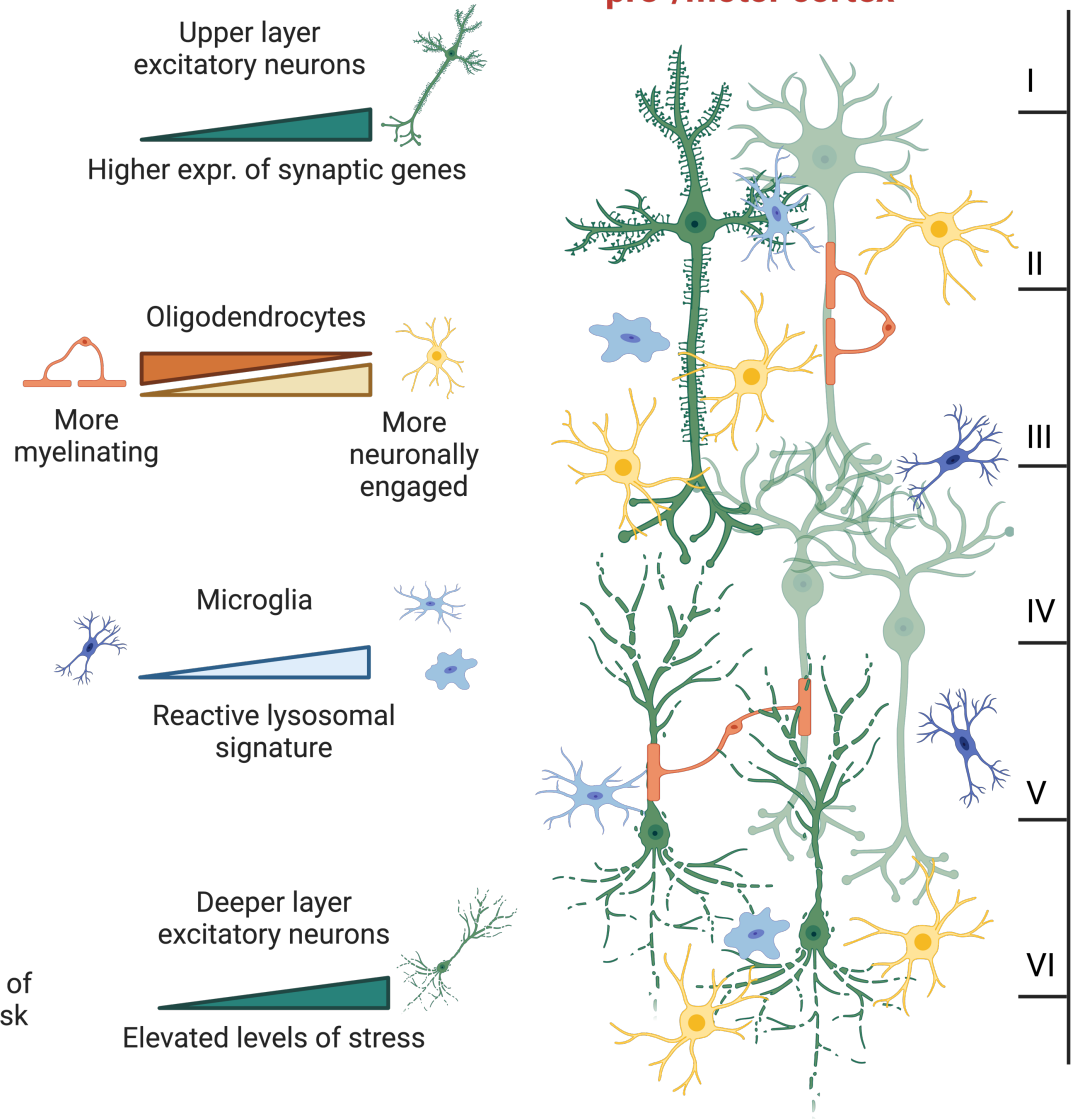

Supplement: 43587_2024_640_MOESM2_ESM.pdf [file 43587_2024_640_MOESM2_ESM.pdf]
